# Supplementary material
Source: Springer Nature journal article supplement (https://www.springermedizin.de/resource/supplementary/12957_2008_508_MOESM1_ESM.pdf/9564872)

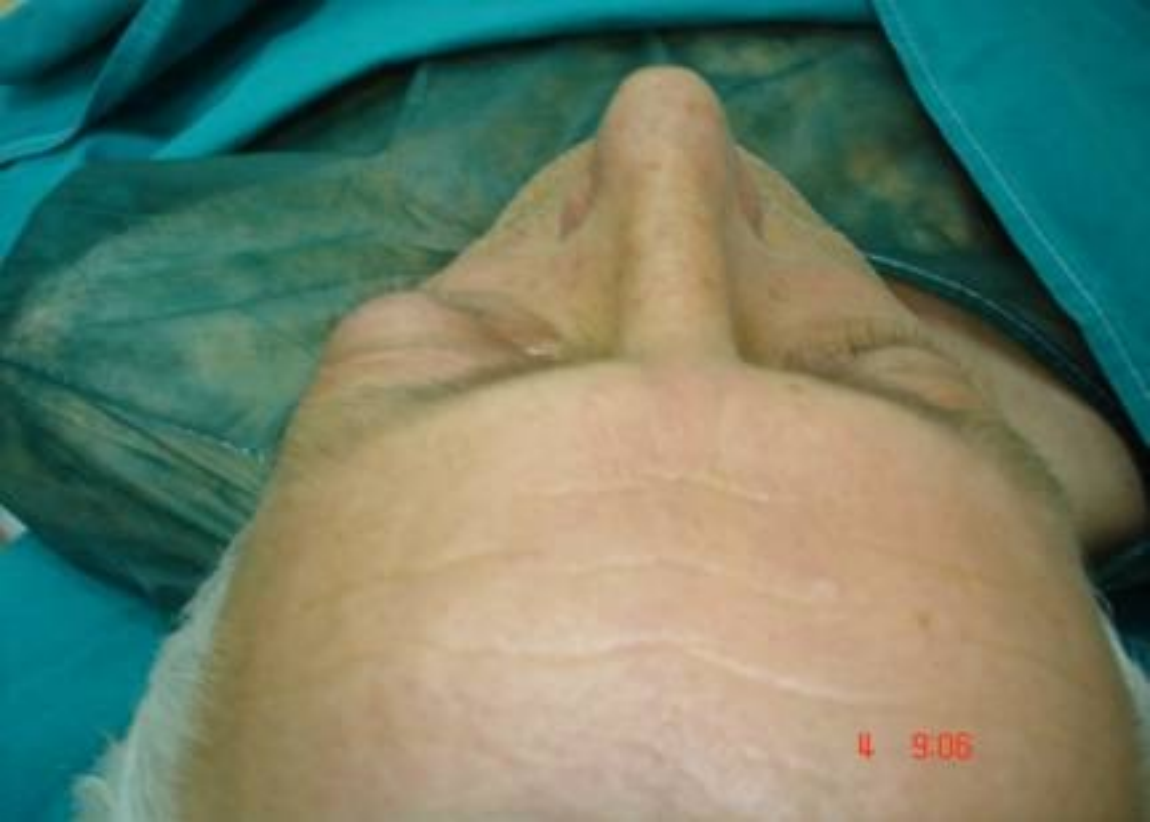

Supplement: MOESM1 [file 9564872]
